# Supplementary material for: Personalized hypertension treatment recommendations by a data-driven model
Source: BMC Med Inform Decis Mak. 2023 Mar 1;23:44. doi: 10.1186/s12911-023-02137-z (PMC9979505; doi:10.1186/s12911-023-02137-z)
Supplement: Supplementary file 1 — Additional file 1. 5 examples of prescription recommendations from 350 generated patients' samples. [file 12911_2023_2137_MOESM1_ESM.xlsx]

## Sheet: Sheet1
8single_prescription_recommendation_350PatinentSamples_20220113
Patients	drlr_knn_random_1st_pres	drlr_knn_random_1st_reduction	drlr_knn_random_2nd_pres	drlr_knn_random_2nd_reduction	drlr_knn_random_3rd_pres	drlr_knn_random_3rd_reduction	prescription_on_record	previous_prescription_on_record	age	sex	lab_sbp	lab_sbp_tau2	lab_sbp_tau3	lab_dbp	Pulse	Past_2yr_HTNdrug_record	Race	Essential hypertension	Diabetes	Chronic systolic heart failure	Atherosclerotic heart disease	Peripheral vascular disease	carbon dioxide, venous blood	creatinine, serum	potassium, serum
1	ACEI	-12.1205	ARB	-11.4364	NULL	-10.3333	NULL	NULL	86	F	152	94.15	126	60	88	NULL	Black	1	1	0	1	0	23	0.83	4.4
2	ACEI	-11.5495	NULL	-11.0344	ARB	-9.24198	CCB	NULL	85	F	150	112	142	77	67	NULL	Black	0	1	0	0	0	23.2857	2.0475	4.4875
3	CCB	-6.37833	NULL	-6.31335	Thiazides	-0.666672	Thiazides	NULL	80	F	140	94.72	132.857	50	71	NULL	White	1	1	0	0	0	24	1.615	4.8
4	Thiazides	-9.25543	ACEI	-5.55323	Mineralocorticoid_receptor_antagonists	-5.08334	CCB	CCB	79	M	144.667	179.571	186.667	84	73.5	CCB,	Black	1	0	0	1	0	30	1.15	3.3
5	ARB	-14.575	ACEI	-13.5349	NULL	-10.3866	Thiazides + Beta-Blockers	Thiazides + Beta-Blockers	80	F	157.2	188.667	182.429	54	66.6	Thiazides, Beta-Blockers,	Black	1	1	0	1	1	34.2533	1.25308	4.41538
